# Supplementary material
Source: publisher site journal article supplement (https://www.dovepress.com/get_supplementary_file.php?f=499771.docx)
Supplement: Supplementary file 1 [file get_supplementary_file.php]

**This file includes:** Supplementary Figures S1; S2

**Figure S1 The potential correlation between SETDB2 mutation status and survival analysis of KIRC using the cBioPortal tool.**


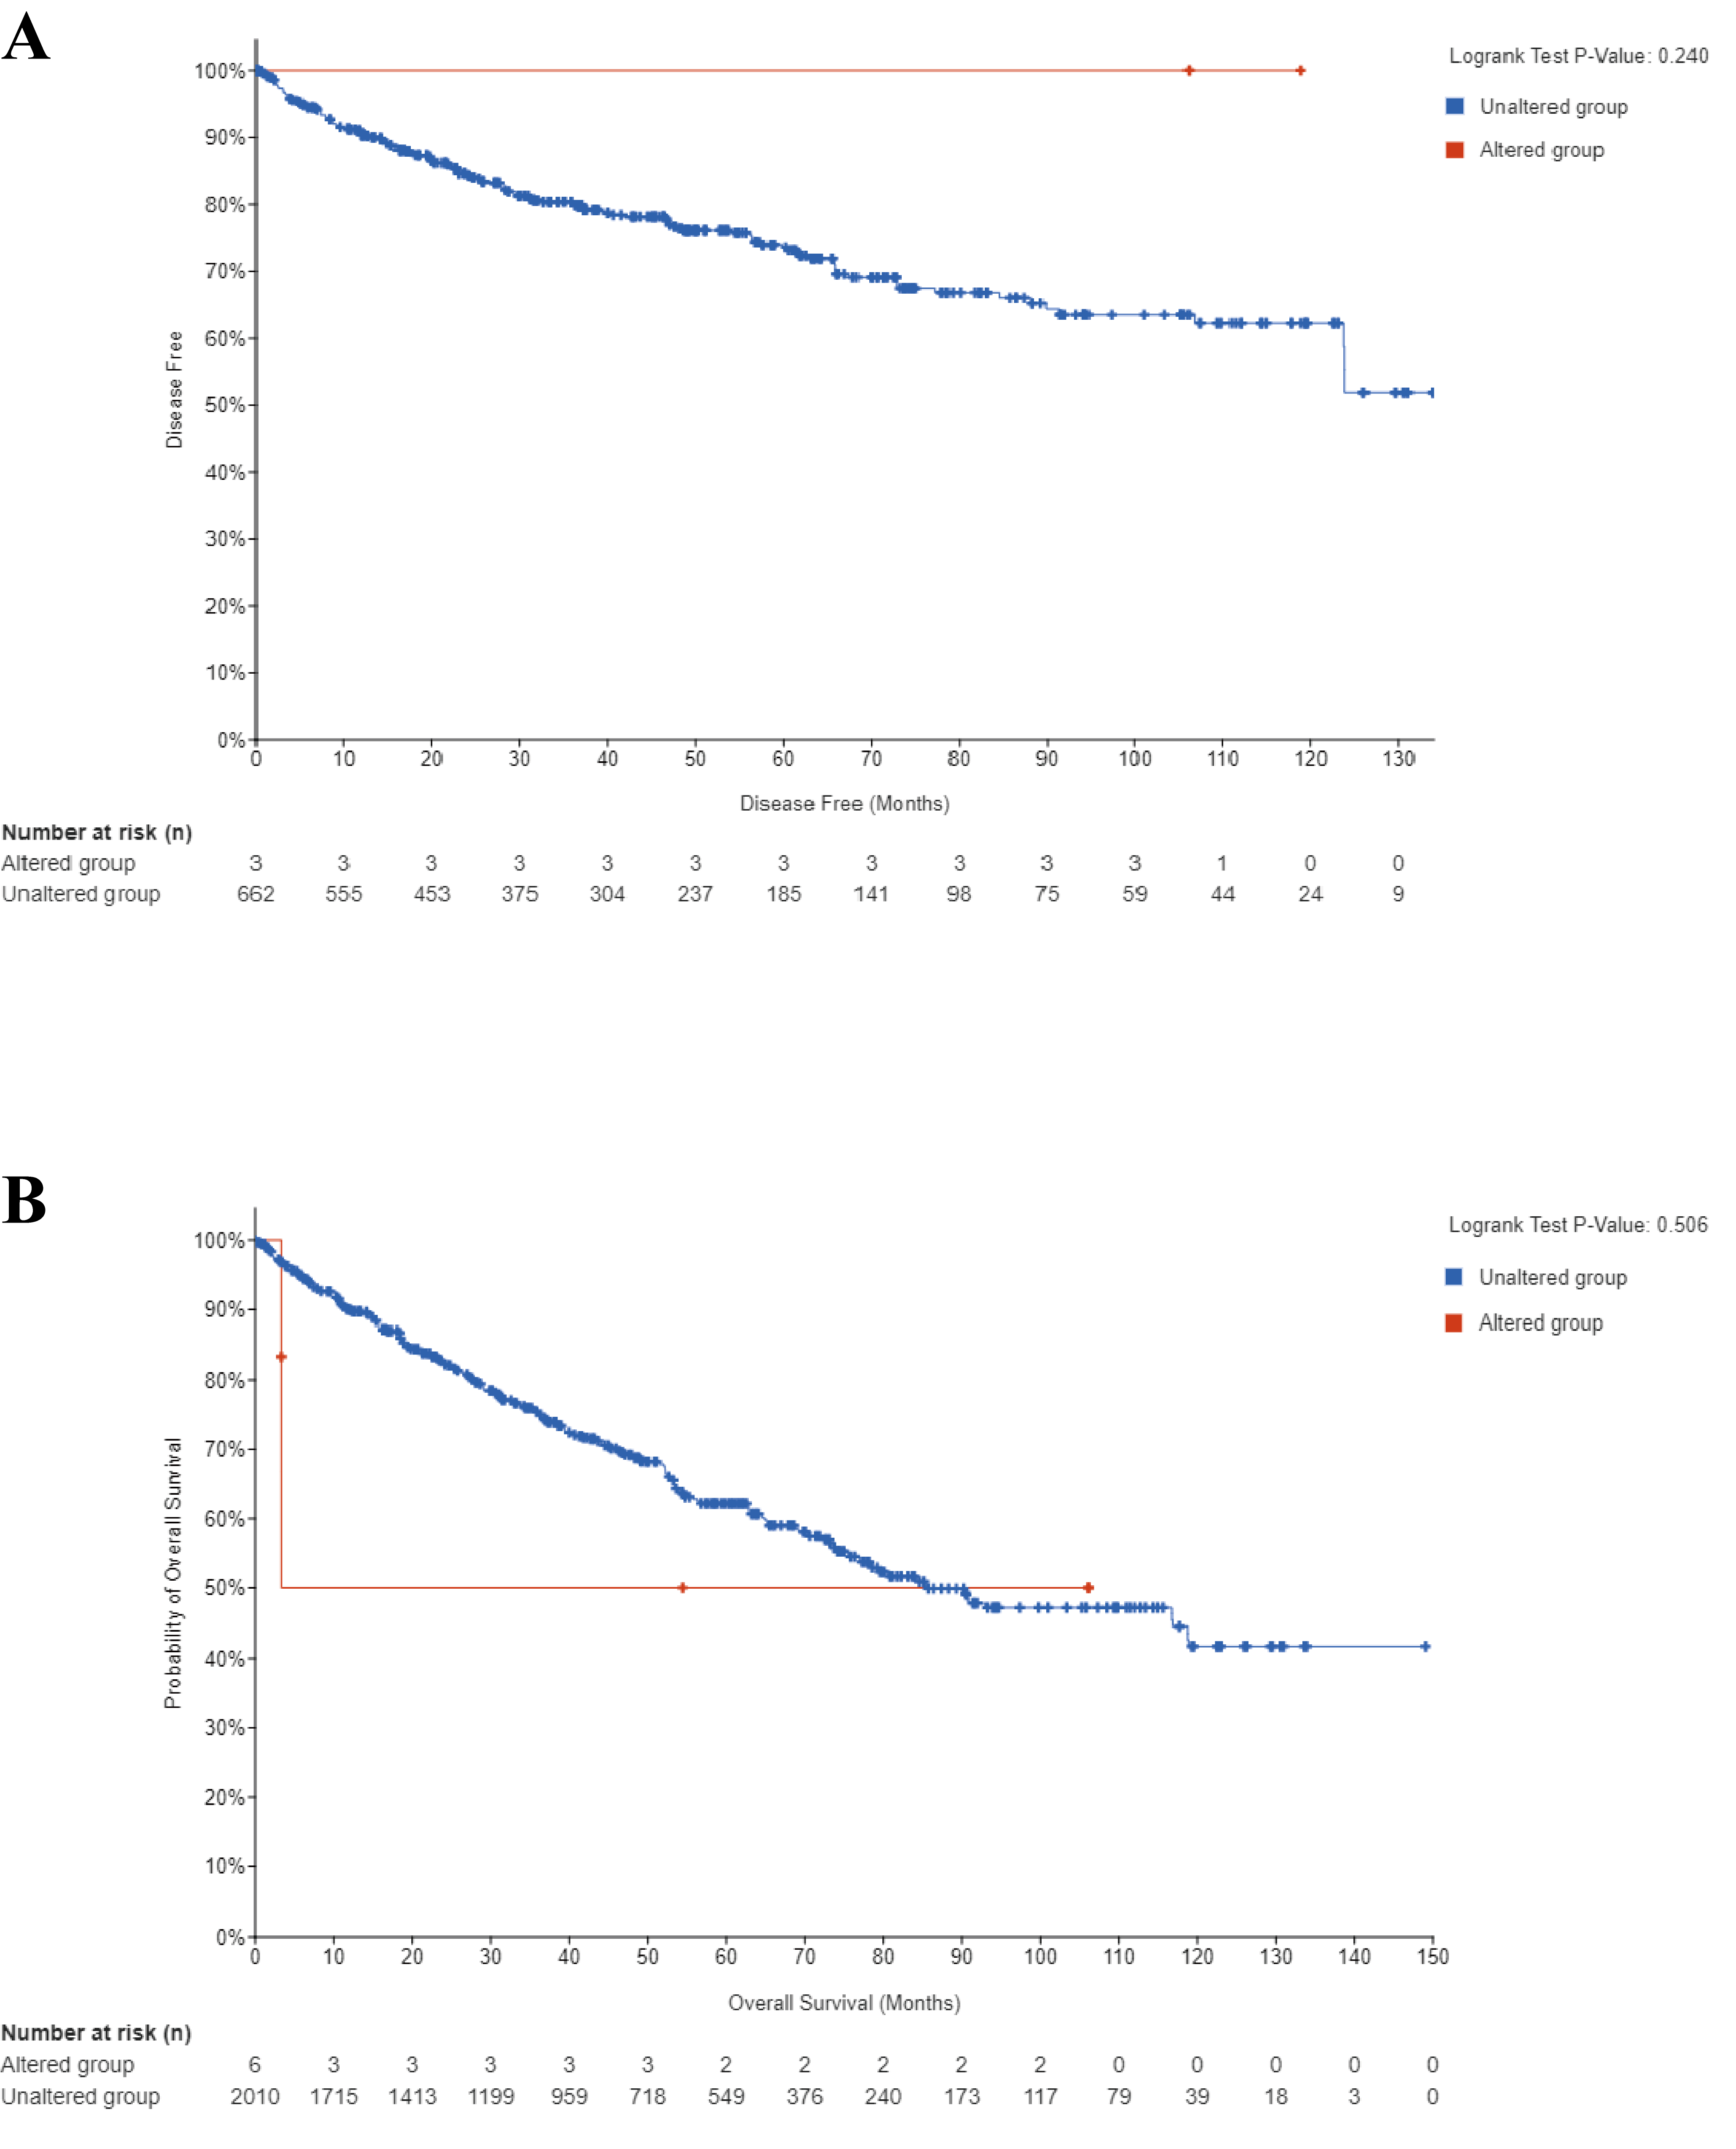


1. The potential correlation between SETDB2 mutation status and disease-free survival of KIRC using the cBioPortal tool. (B) The potential correlation between SETDB2 mutation status and Progress Free Survival of KIRC using the cBioPortal tool.

**Figure S2 The KIRC-related checkpoints and the tumor mutational burden (TMB) among SETDB2**

**
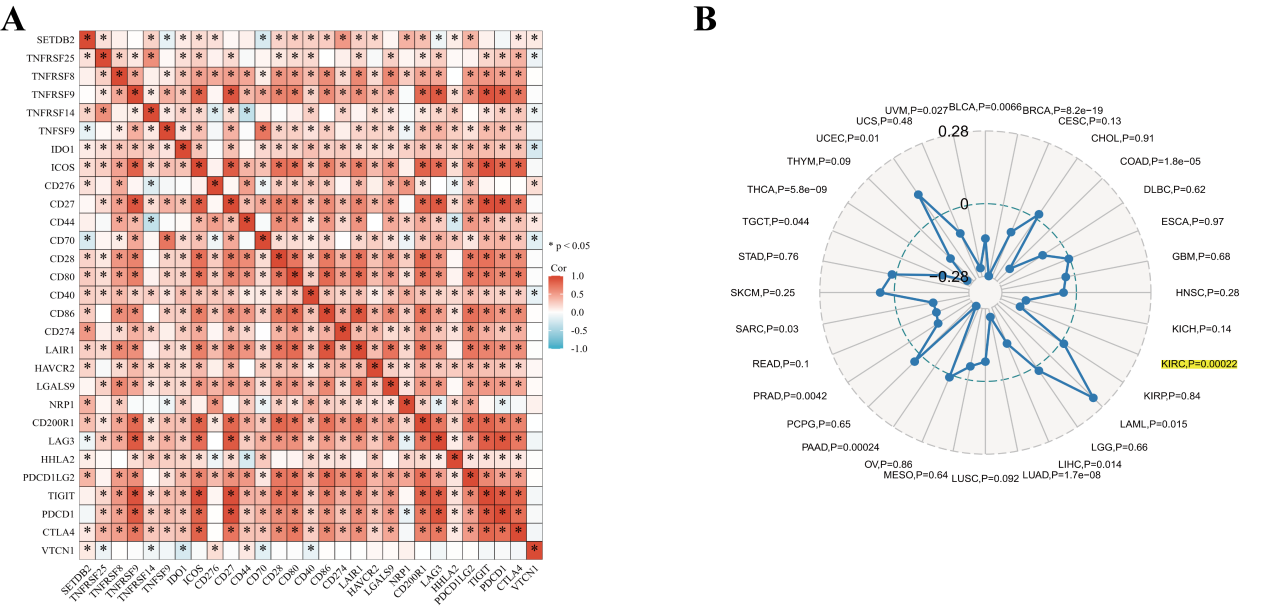
**

(A) The association between SETDB2 and KIRC-related checkpoints. (B) The association between SETDB2 and TMB in KIRC.
